# Supplementary material for: Sirtuin 3 Restores Synthesis and Secretion of Very Low-Density Lipoproteins in Cow Hepatocytes Challenged with Nonesterified Fatty Acids In Vitro
Source: MDPI journal article supplement (doi:10.3390/vetsci8070121), 2021-06-30
Supplement: s1 [file s1]

**Table S1.** siRNA sequences for SIRT3 silencing.

| RNA              | Sequence                                                                      |
|------------------|-------------------------------------------------------------------------------|
| si-SIRT3-1       | sense: 5'-GGUGGAGGAUGGUCCAUAUTT-3'<br>antisense: 5'-AUAUGGACCAUCCUCCACCTT-3'  |
| si-SIRT3-2       | Sense: 5'-CCAGCGGCAUCCCAGACUUTT-3'<br>antisense: 5'-AAGUCUGGGAUGCCGCUGGTT-3'  |
| si-SIRT3-3       | sense: 5'-CCCUGACUCAAAAGCUCGUUTT-3'<br>antisense: 5'-AACGAGCUUUGAGUCAGGGTT-3' |
| Negative Control | sense: 5'-UUCUCCGAACGUGUCACGUTT-3'<br>antisense: 5'-ACGUGACACGUUCGGAGAATT-3'  |

**Table S2.** The primers sequences for qRT-PCR.

| Gene           | Access number  | Primer sequences (5'-3')                                 | Product length (bp) |
|----------------|----------------|----------------------------------------------------------|---------------------|
| MTP            | NM_001101834.1 | F: CCATTCGGCATCTACTTACAGC<br>R: AGCCAGCATAGGAGTCAAGGTTCT | 187                 |
| ApoB           | BC_103438.1    | F: GATACTCAGAACGGAGCAAT<br>R: GCACCAATCAGATAACAGGA       | 223                 |
| ApoE           | NM_173991.2    | F: TCCTGAATGACCTGGGTGTTG<br>R: TCTGTGGGTTGCCGTGGTG       | 217                 |
| $\beta$ -actin | BC-142413.1    | F: GCCCTGAGGCTCTCTTCCA<br>R: GCGGATGTGACGTCACA           | 101                 |
